# Supplementary material for: Immunogenicity and safety of anti-SARS-CoV-2 mRNA vaccines in patients with chronic inflammatory conditions and immunosuppressive therapy in a monocentric cohort
Source: HighWire-hosted journal article supplement (doi:10.1136/annrheumdis-2021-220272), 2021-03-24

## Supplement Figure 1

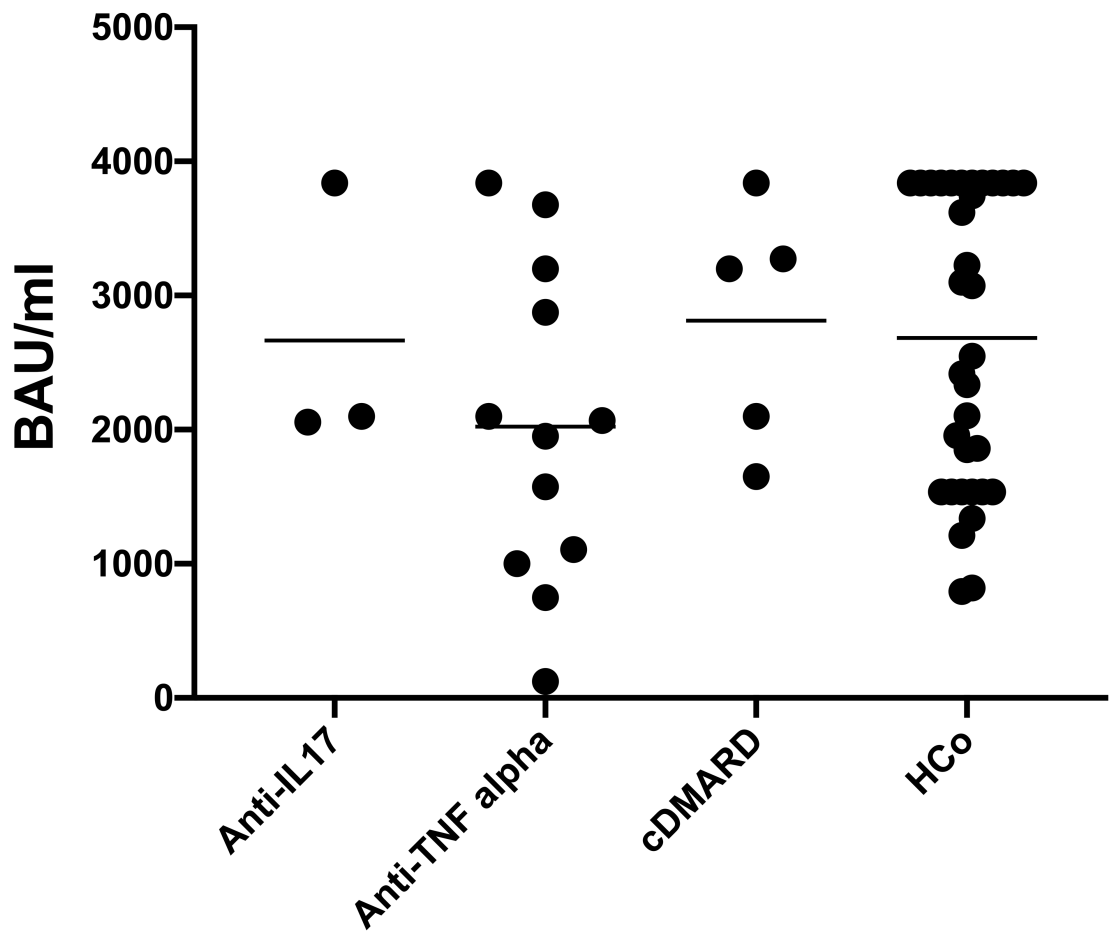

Supplement: annrheumdis-2021-220272supp001_data_supplement.pdf [file annrheumdis-2021-220272supp001_data_supplement.pdf]
