# Supplementary material for: Immunogenicity and safety of anti-SARS-CoV-2 mRNA vaccines in patients with chronic inflammatory conditions and immunosuppressive therapy in a monocentric cohort
Source: HighWire-hosted journal article supplement (doi:10.1136/annrheumdis-2021-220272), 2021-03-24
Supplement: annrheumdis-2021-220272supp002_data_supplement.pdf [file annrheumdis-2021-220272supp002_data_supplement.pdf]

## Supplement:

|                                                      | SARS-CoV-2 IgA (U/mL) |                   |                   | SARS-CoV-2 IgG (BAU/mL) |                   |                   | cPass neutralizing capacity (%) |                   |                   |
|------------------------------------------------------|-----------------------|-------------------|-------------------|-------------------------|-------------------|-------------------|---------------------------------|-------------------|-------------------|
|                                                      | day 0                 | day 0 2nd<br>vacc | day 7 2nd<br>vacc | day 0                   | day 0 2nd<br>vacc | day 7 2nd<br>vacc | day 0                           | day 0 2nd<br>vacc | day 7 2nd<br>vacc |
| patients with<br>chronic<br>inflammatory<br>diseases | 1.00                  | 3.04              | 5.76              | 3.20                    | 33.10             | 122.00            | 3                               | 2                 | 37                |
|                                                      | 1.00                  | 1.00              | 12.38             | 4.89                    | 127.00            | 3676.00           | 0                               | 27                | 96                |
|                                                      | 1.00                  | 1.00              | 1.97              | 18.10                   | 53.10             | 1001.00           | 0                               | 0                 | 95                |
|                                                      | 1.00                  | 9.00              | 66.68             | 3.61                    | 269.00            | 3273.00           | 0                               | 56                | 96                |
|                                                      | 1.00                  | 1.63              | 19.07             | 3.20                    | 342.00            | 3200.00           | 0                               | 76                | 97                |
|                                                      | 1.00                  |                   | 4.78              |                         |                   | 1650.00           | 0                               |                   | 97                |
|                                                      | 1.00                  | 1.00              | 16.30             | 3.20                    | 56.30             | 1107.00           | 3                               | 1                 | 95                |
|                                                      | 1.00                  | 2.33              | 55.50             | 3.20                    | 96.30             | 2067.00           | 0                               | 49                | 97                |
|                                                      | 1.00                  | 1.60              | 8.84              | 3.20                    | 96.60             |                   | 0                               | 37                | 95                |
|                                                      | 1.00                  | 1.00              | 3.87              | 3.20                    | 83.50             | 2100.00           | 0                               | 20                | 96                |
|                                                      | 1.00                  |                   | 1.00              | 11.60                   | 9.31              | 98.20             | 2                               |                   | 45                |
|                                                      | 1.00                  | 1.37              | 29.40             | 3.20                    | 326.00            | 2055.00           | 5                               | 83                | 97                |
|                                                      | 1.17                  |                   | 6.53              | 3.20                    | 36.40             | 3840.00           | 0                               |                   | 94                |
|                                                      | 1.00                  | 5.09              | 120.74            | 3.20                    | 318.00            | 3840.00           | 0                               | 65                | 97                |
|                                                      | 1.00                  | 3.37              | 10.10             | 3.20                    | 206.00            | 3200.00           | 0                               | 45                | 97                |
|                                                      | 1.00                  | 7.52              | 40.36             | 3.52                    | 857.00            | 3840.00           | 0                               | 81                | 97                |
|                                                      | 1.77                  | 6.84              | 18.54             | 3.20                    | 128.00            | 611.68            | 0                               | 24                | 88                |
|                                                      | 1.00                  | 1.00              | 1.04              | 3.20                    | 80.90             | 2875.00           | 0                               | 29                | 80                |
|                                                      | 1.00                  | 20.66             | 30.50             | 3.20                    | 83.50             | 2100.00           | 0                               | 46                | 97                |
|                                                      | 1.00                  |                   | 81.36             | 3.20                    | 384.00            | 3840.00           | 0                               |                   | 97                |
| 1.00                                                 |                       | 10.37             | 3.20              | 40.30                   | 1950.00           |                   |                                 |                   |                   |
| 1.00                                                 |                       | 4.90              | 3.20              | 25.60                   | 91.50             | 0                 |                                 | 82                |                   |
| 1.00                                                 |                       | 6.76              | 3.20              | 72.90                   | 560.00            | 0                 |                                 | 46                |                   |
|                                                      |                       |                   | 3.20              |                         | 2029.00           |                   |                                 |                   |                   |
| Healthy<br>volunteers                                | 1.00                  | 12.32             | 11.98             | 12.30                   |                   | 1536.00           | 0                               | 67                | 96                |
|                                                      | 1.00                  |                   |                   | 3.20                    |                   |                   | 0                               |                   |                   |
|                                                      | 1.00                  | 1.00              | 27.56             | 3.20                    |                   | 1536.00           | 0                               | 29                | 96                |
|                                                      | 1.00                  | 6.64              | 42.99             | 3.20                    |                   |                   | 0                               | 61                | 97                |
|                                                      | 1.00                  | 17.84             | 116.28            | 9.15                    |                   | 1536.00           | 2                               | 81                | 97                |
|                                                      | 1.00                  | 8.35              | 40.39             | 3.20                    |                   | 3744.00           | 2                               | 74                | 96                |
|                                                      | 1.00                  | 4.48              |                   | 3.20                    |                   |                   | 0                               | 73                |                   |
|                                                      | 1.00                  | 12.93             | 52.85             | 5.12                    |                   | 1536.00           | 1                               | 76                | 97                |
|                                                      | 1.00                  | 12.91             | 172.35            | 16.70                   |                   | 3840.00           | 0                               | 67                | 97                |
|                                                      | 1.00                  | 6.39              | 37.01             | 3.20                    |                   | 3840.00           | 3                               | 68                | 97                |
|                                                      | 1.00                  | 3.04              | 26.94             | 3.93                    |                   |                   | 1                               | 57                | 96                |
|                                                      | 1.00                  | 2.49              | 5.60              | 3.20                    |                   | 3840.00           | 2                               | 81                | 97                |
|                                                      | 1.00                  | 12.68             | 127.23            | 3.93                    |                   |                   | 8                               | 83                | 97                |
|                                                      | 1.00                  | 13.12             | 129.58            | 3.20                    |                   | 1536.00           | 3                               | 85                | 97                |
|                                                      | 1.00                  | 7.24              | 24.05             | 3.77                    |                   | 3225.00           | 1                               | 84                | 96                |
|                                                      | 1.00                  | 21.94             | 73.59             | 5.60                    |                   | 3840.00           | 3                               | 68                | 97                |
|                                                      | 1.00                  | 1.96              | 19.48             | 3.20                    |                   | 2547.00           | 3                               | 48                | 96                |
|                                                      | 1.00                  | 10.84             | 31.81             | 3.84                    |                   | 3840.00           | 6                               | 74                | 95                |
|                                                      | 1.00                  | 2.75              | 34.12             | 3.20                    |                   | 2416.00           | 0                               | 37                | 96                |
|                                                      | 1.00                  |                   | 12.71             | 3.20                    |                   | 1536.00           | 3                               | 52                | 96                |
|                                                      | 1.00                  |                   | 32.09             | 3.68                    |                   | 1536.00           | 1                               |                   | 97                |
|                                                      | 1.00                  |                   | 4.85              | 3.20                    |                   | 819.00            | 3                               |                   | 91                |
|                                                      | 1.00                  |                   | 123.89            | 6.17                    |                   | 1536.00           | 0                               |                   | 96                |
|                                                      | 1.00                  |                   | 26.74             | 3.20                    |                   | 3619.00           | 5                               |                   | 97                |
|                                                      | 1.00                  |                   | 27.59             | 4.32                    |                   | 3840.00           | 2                               |                   | 92                |
|                                                      |                       |                   |                   | 3.20                    |                   |                   |                                 |                   |                   |
|                                                      |                       |                   |                   | 19.90                   |                   | 1955.00           |                                 |                   |                   |
|                                                      |                       |                   |                   | 3.20                    |                   | 793.00            |                                 |                   |                   |
|                                                      |                       |                   | 5.85              |                         | 3840.00           |                   |                                 |                   |                   |
|                                                      |                       |                   | 3.20              |                         | 3840.00           |                   |                                 |                   |                   |
|                                                      |                       |                   | 3.20              |                         | 3840.00           |                   |                                 |                   |                   |
|                                                      |                       |                   | 3.20              |                         | 3072.00           |                   |                                 |                   |                   |
|                                                      |                       |                   | 3.20              |                         | 1536.00           |                   |                                 |                   |                   |
|                                                      |                       |                   | 3.20              |                         | 3840.00           |                   |                                 |                   |                   |
|                                                      |                       |                   | 3.20              |                         | 3840.00           |                   |                                 |                   |                   |
|                                                      |                       |                   |                   |                         | 3840.00           |                   |                                 |                   |                   |
|                                                      |                       |                   | 3.20              |                         | 2336.00           |                   |                                 |                   |                   |
|                                                      |                       |                   | 3.20              |                         | 1337.00           |                   |                                 |                   |                   |
|                                                      |                       |                   | 3.40              |                         |                   |                   |                                 |                   |                   |
|                                                      |                       |                   | 3.20              |                         |                   |                   |                                 |                   |                   |
|                                                      |                       |                   |                   |                         | 1536.00           |                   |                                 |                   |                   |
